# Supplementary material for: Phylogenomic data resolved the deep relationships of Gymnogynoideae (Selaginellaceae)
Source: Front Plant Sci. 2024 Jul 16;15:1405253. doi: 10.3389/fpls.2024.1405253 (PMC11287774; doi:10.3389/fpls.2024.1405253)
Supplement: Supplementary Table 1 — List of plastomes used in this study. Subgenus Gymnogynum in the row of “Subgenus (Zhou and Zhang, 2015)” is identical to S. subg. Ericetorium Jerm sensu Zhou and Zhang (2015). [file Table_1.xlsx]

## Sheet: TableS1
Species	Genus (Zhou & Zhang 2023)	Subgenus (Weststrand & Korall 2016)	Sections of Gymnogynum in Zhou & Zhang’s (2015) classification	Voucher	Locations
Afroselaginella myosurus (Sw.) Li Bing Zhang & X.M. Zhou -1	Afroselaginella	Exaltatae	Myosurus	C.J.Rothfels et al., 08-183 (MO)	Costa Rica
Afroselaginella myosurus (Sw.) Li Bing Zhang & X.M. Zhou -2	Afroselaginella	Exaltatae	Myosurus	C.C.H.Jongkind 10590 (MO)	Guinea (Africa)
Bryodesma × neomexicanum (Maxon) Skoda	Bryodesma	Rupestrae	Homoeophyllae	Beck 1055	USA
Bryodesma bigelovii (Underw.) Soják	Bryodesma	Rupestrae	Homoeophyllae	C.J.Rothfels 2556 (DUKE)	USA
Bryodesma emodi (Fraser-Jenk.) Li Bing Zhang & X.M. Zhou	Bryodesma	Rupestrae	Homoeophyllae	X.-C.Zhang 6255 (PE)	China
Bryodesma landii (Greenm. & N. Pfeiff.) Li Bing Zhang & X.M. Zhou	Bryodesma	Rupestrae	Homoeophyllae	C.J.Rothfels 3111 (DUKE)	Mexico
Bryodesma muticum (D.C. Eaton ex Underw.) Soják	Bryodesma	Rupestrae	Homoeophyllae	L.B.Zhang & X.-M.Zhou 635	USA
Bryodesma limitaneum (Weath.) Li Bing Zhang & X.M. Zhou -1	Bryodesma	Rupestrae	Homoeophyllae	C.J.Rothfels 2505 (DUKE)	USA
Bryodesma limitaneum (Weath.) Li Bing Zhang & X.M. Zhou -2	Bryodesma	Rupestrae	Homoeophyllae	C.J.Rothfels 2495 (DUKE)	USA
Bryodesma peruvianum (Milde) Soják	Bryodesma	Rupestrae	Homoeophyllae	C.J.Rothfels 2987 (MEXU)	Mexico
Bryodesma rupestre (L.) Soják	Bryodesma	Rupestrae	Homoeophyllae	C.J.Rothfels 2844 (DUKE)	USA
Bryodesma rupincola (Underw.) Soják	Bryodesma	Rupestrae	Homoeophyllae	C.J.Rothfels 2508 (DUKE)	USA
Bryodesma tortipilum (A. Braun) Soják	Bryodesma	Rupestrae	Homoeophyllae	C.J.Rothfels 3777 (DUKE)	USA
Bryodesma underwoodii (Hieron.) Soják	Bryodesma	Rupestrae	Homoeophyllae	C.J.Rothfels 2510 (DUKE)	USA
Bryodesma vardei (H. Lév.) Soják	Bryodesma	Rupestrae	Homoeophyllae	X.C.Zhang 6948 (PE)	China
Bryodesma wallacei (Hieron.) Soják -1	Bryodesma	Rupestrae	Homoeophyllae	C.J.Rothfels 2932 (DUKE)	USA
Bryodesma wallacei (Hieron.) Soják -2	Bryodesma	Rupestrae	Homoeophyllae	C.J.Rothfels 4186 (DUKE)	USA
Didiclis mayeri (Hieron.) Li Bing Zhang & X.M. Zhou	Didiclis	Stachygynandrum	Oligomacrosporangiatae	L.-B.Zhang et al. 10405 (PYU)	Thailand (Cult.)
Didiclis picta (Griff.) Li Bing Zhang & X.M. Zhou	Didiclis	Stachygynandrum	Oligomacrosporangiatae	L.-B.Zhang et al. 7994 (CDBI)	Vietnam
Ericetorum lyallii (Hook. & Grev.) Li Bing Zhang & X.M. Zhou -1	Ericetorum	Ericetorum	Lyallia	Razakamalala & Jaowind 293 (MO)	Madagascar
Ericetorum lyallii (Hook. & Grev.) Li Bing Zhang & X.M. Zhou -2	Ericetorum	Ericetorum	Lyallia	P.Antilahimena & et al. 3636 (MO)	Madagascar
Ericetorum lyallii (Hook. & Grev.) Li Bing Zhang & X.M. Zhou -3	Ericetorum	Ericetorum	Lyallia	Unknown	Unknown
Ericetorum pectinatum (Spring) Li Bing Zhang & X.M. Zhou -1	Ericetorum	Ericetorum	Lyallia	F.Rakotondrainibe, 6494 (MO)	Madagascar
Ericetorum pectinatum (Spring) Li Bing Zhang & X.M. Zhou -2	Ericetorum	Ericetorum	Lyallia	J.R.Torze & E.Toninjama 1172 (MO)	Madagascar
Gymnogynum arthriticum (Alston) Li Bing Zhang & X.M. Zhou	Gymnogynum	Gymnogynum	Articulatae	C.J.Rothfels 08-113 (DUKE)	Costa Rica
Gymnogynum kraussianum (Kunze) Weakley	Gymnogynum	Gymnogynum	Articulatae	Unknown	Unknown
Gymnogynum lingulatum (Spring) Li Bing Zhang & X.M. Zhou	Gymnogynum	Gymnogynum	Articulatae	C.J.Rothfels 08-096 (DUKE)	Costa Rica
Gymnogynum remotifolium (Spring) Li Bing Zhang & X.M. Zhou -1	Gymnogynum	Gymnogynum	Articulatae	Unknown	Unknown
Gymnogynum remotifolium (Spring) Li Bing Zhang & X.M. Zhou -2	Gymnogynum	Gymnogynum	Articulatae	X.-M.Zhou 722 (PYU)	China
Gymnogynum silvestre (Aspl.) Li Bing Zhang & X.M. Zhou	Gymnogynum	Gymnogynum	Articulatae	J.B.Beck 1218 (DUKE)	Mexico
Kungiselaginella biformis (A. Braun ex Kuhn) Li Bing Zhang & X.M. Zhou	Kungiselaginella	Stachygynandrum	Plagiophyllae	L.-B.Zhang et al. 9004 (CDBI)	Vietnam
Lepidoselaginella lepidophylla (Hook. & Grev.) Li Bing Zhang & X.M. Zhou -2	Lepidoselaginella	Lepidophyllae	Lepidophyllae	Unknown	USA
Lepidoselaginella lepidophylla (Hook. & Grev.) Li Bing Zhang & X.M. Zhou -1	Lepidoselaginella	Lepidophyllae	Lepidophyllae	A.Cruz-Espinosa 1037 (MEXU)	Mexico
Megaloselaginella exaltata (Kunze) Li Bing Zhang & X.M. Zhou -1	Megaloselaginella	Exaltatae	Megalosporarum	Eida. Fletes 209 (MO)	Costa Rica
Megaloselaginella exaltata (Kunze) Li Bing Zhang & X.M. Zhou -2	Megaloselaginella	Exaltatae	Megalosporarum	sc. sn.	China (cult.)
Megaloselaginella [A. grallipes (Alston) Li Bing Zhang & X.M. Zhou]	Afroselaginella	Exaltatae	Megalosporarum	C.Aedo & M.Velacyol (MO)	Guinea (Africa)
Selaginella pallescens (C. Presl) Spring	Selaginella	Stachygynandrum	Pallescentes	Testo 678 (CR, VT)	Costa Rica
Isoetes humilior F.Muell. ex A.Braun				H2016/0029759 (Kew Gardens, UK)	Australia
Isoetes coromandelina L.				H2016/0029745 (Kew Gardens, UK)	India
