# Supplementary material for: Phylogenomic data resolved the deep relationships of Gymnogynoideae (Selaginellaceae)
Source: Front Plant Sci. 2024 Jul 16;15:1405253. doi: 10.3389/fpls.2024.1405253 (PMC11287774; doi:10.3389/fpls.2024.1405253)
Supplement: Supplementary Table 2 — Best-fitting likelihood model for maximum likelihood (ML) and Bayesian inference analyses (BI) for each dataset in this study. [file Table_2.xlsx]

## Sheet: TableS2
	codon12	codon12_RE	codon12_RG	codon12_REG	gene	gene_RE	gene_RG	gene_REG	intergene	intergene_RE	intergene_RG	intergene_REG	gene_intergene	gene_intergene_RE	gene_intergene_RG	gene_intergene_REG	SCGs	SCGs_codon12	SCGs_gene	SCGs_intergene	SCGs_gene_intergene
ML	SYM+I+G4	SYM+I+G4	SYM+I+G4	SYM+I+G4	SYM+I+G4	SYM+I+G4	SYM+I+G4	SYM+I+G4	TVMe+I+G4	TVMe+I+G4	SYM+I+G4	SYM+I+G4	SYM+I+G4	SYM+I+G4	SYM+I+G4	SYM+I+G4	GTR+F+I+G4	GTR+F+I+G4	GTR+F+I+G4	GTR+F+I+G4	GTR+F+I+G4
BI	SYM+I+G4	SYM+I+G4	SYM+I+G4	SYM+I+G4	SYM+I+G4	SYM+I+G4	SYM+I+G4	SYM+I+G4	SYM+I+G4	SYM+I+G4	SYM+I+G4	SYM+I+G4	SYM+I+G4	SYM+I+G4	SYM+I+G4	SYM+I+G4	GTR+F+I+G4	GTR+F+I+G4	GTR+F+I+G4	GTR+F+I+G4	GTR+F+I+G4
