# Supplementary material for: Phylogenomic data resolved the deep relationships of Gymnogynoideae (Selaginellaceae)
Source: Front Plant Sci. 2024 Jul 16;15:1405253. doi: 10.3389/fpls.2024.1405253 (PMC11287774; doi:10.3389/fpls.2024.1405253)
Supplement: Supplementary Table 3 — List of the loci in each dataset. [file Table_3.xlsx]

## Sheet: TableS3
codon12	gene	intergene	gene_intergene	codon12_RE	gene_RE	intergene_RE	gene_intergene_RE	codon12_RG	gene_RG	intergene_RG	gene_intergene_RG	codon12_REG	gene_REG	intergene_REG	gene_intergene_REG
atpA	atpA	atpA_ycf12	atpA	atpA	atpA	atpA_ycf12	atpA	atpA	atpA	atpA_ycf12	atpA	atpA	atpA	atpA_ycf12	atpA
atpB	atpB	atpB_rbcL	atpA_ycf12	atpB	atpB	atpB_rbcL	atpA_ycf12	atpB	atpB	atpB_rbcL	atpB	atpB	atpB	atpB_rbcL	atpB
atpE	atpE	atpH_atpI	atpB	atpE	atpE	atpH_atpI	atpB	atpE	atpE	atpH_atpI	atpB_rbcL	atpE	atpE	atpH_atpI	atpB_rbcL
atpF	atpF	petB_petD	atpB_rbcL	atpF	atpF	petB_petD	atpB_rbcL	atpF	atpF	petB_petD	atpE	atpF	atpF	petB_petD	atpE
atpH	atpH	petB_psbH	atpE	atpH	atpH	petB_psbH	atpE	atpH	atpH	petB_psbH	atpF	atpH	atpH	petB_psbH	atpF
atpI	atpI	petG_petL	atpF	atpI	atpI	petG_petL	atpF	atpI	atpI	petG_petL	atpH	atpI	atpI	petG_petL	atpH
ccsA	ccsA	petG_psaJ	atpH	ccsA	ccsA	petG_psaJ	atpH	ccsA	ccsA	petG_psaJ	atpH_atpI	ccsA	ccsA	petG_psaJ	atpH_atpI
clpP	clpP	petL_psbE	atpH_atpI	petA	clpP	petL_psbE	atpH_atpI	clpP	clpP	petL_psbE	atpI	petA	clpP	petL_psbE	atpI
petA	petA	psaA_psaB	atpI	petB	petA	psaA_psaB	atpI	petA	petA	psaA_ycf3	ccsA	petB	petA	psaA_ycf3	ccsA
petB	petB	psaA_ycf3	ccsA	petD	petB	psaA_ycf3	ccsA	petB	petB	psaI_rbcL	clpP	petD	petB	psaI_rbcL	clpP
petD	petD	psaI_rbcL	clpP	petG	petD	psaI_rbcL	clpP	petD	petD	psbB_psbT	petA	petG	petD	psbB_psbT	petA
petG	petG	psbB_psbT	petA	petL	petG	psbB_psbT	petA	petG	petG	psbC_psbZ	petB	petL	petG	psbC_psbZ	petB
petL	petL	psbC_psbZ	petB	psaA	petL	psbC_psbZ	petB	petL	petL	psbJ_psbL	petB_petD	psaA	petL	psbN_psbT	petB_petD
psaA	psaA	psbF_psbL	petB_petD	psaB	psaA	psbF_psbL	petB_petD	psaA	psaA	psbN_psbT	petB_psbH	psaB	psaA	rpl16_rps3	petB_psbH
psaB	psaB	psbH_psbN	petB_psbH	psaC	psaB	psbN_psbT	petB_psbH	psaB	psaB	rpl16_rps3	petD	psaC	psaB	rpl22_rps3	petD
psaC	psaC	psbJ_psbL	petD	psaI	psaC	rpl16_rps3	petD	psaC	psaC	rpl22_rps3	petG	psaI	psaC	rpoA_rps11	petG
psaI	psaI	psbN_psbT	petG	psaJ	psaI	rpl22_rps19	petG	psaI	psaI	rpoA_rps11	petG_petL	psaJ	psaI	rpoC1_rpoC2	petG_petL
psaJ	psaJ	rpl16_rps3	petG_petL	psbA	psaJ	rpl22_rps3	petG_petL	psaJ	psaJ	rpoC1_rpoC2	petG_psaJ	psbA	psaJ	rps4_ycf3	petG_psaJ
psbA	psbA	rpl22_rps19	petG_psaJ	psbB	psbA	rpoA_rps11	petG_psaJ	psbA	psbA	rps4_ycf3	petL	psbB	psbA		petL
psbB	psbB	rpl22_rps3	petL	psbC	psbB	rpoC1_rpoC2	petL	psbB	psbB		petL_psbE	psbC	psbB		petL_psbE
psbC	psbC	rpoA_rps11	petL_psbE	psbD	psbC	rps4_ycf3	petL_psbE	psbC	psbC		psaA	psbD	psbC		psaA
psbD	psbD	rpoC1_rpoC2	psaA	psbE	psbD		psaA	psbD	psbD		psaA_psaB	psbE	psbD		psaA_psaB
psbE	psbE	rps4_ycf3	psaA_psaB	psbF	psbE		psaA_psaB	psbE	psbE		psaA_ycf3	psbF	psbE		psaA_ycf3
psbF	psbF		psaA_ycf3	psbH	psbF		psaA_ycf3	psbF	psbF		psaB	psbH	psbF		psaB
psbH	psbH		psaB	psbI	psbH		psaB	psbH	psbH		psaC	psbI	psbH		psaC
psbI	psbI		psaC	psbJ	psbI		psaC	psbI	psbI		psaI	psbJ	psbI		psaI
psbJ	psbJ		psaI	psbK	psbJ		psaI	psbJ	psbJ		psaI_rbcL	psbK	psbJ		psaI_rbcL
psbK	psbK		psaI_rbcL	psbL	psbK		psaI_rbcL	psbK	psbK		psaJ	psbL	psbK		psaJ
psbL	psbL		psaJ	psbM	psbL		psaJ	psbL	psbL		psbA	psbM	psbL		psbA
psbM	psbM		psbA	psbN	psbM		psbA	psbM	psbM		psbB	psbN	psbM		psbB
psbN	psbN		psbB	psbT	psbN		psbB	psbN	psbN		psbB_psbT	psbT	psbN		psbB_psbT
psbT	psbT		psbB_psbT	psbZ	psbT		psbB_psbT	psbT	psbT		psbC	psbZ	psbT		psbC
psbZ	psbZ		psbC	rbcL	psbZ		psbC	psbZ	psbZ		psbC_psbZ	rbcL	psbZ		psbC_psbZ
rbcL	rbcL		psbC_psbZ	rpl16	rbcL		psbC_psbZ	rbcL	rbcL		psbD	rpl16	rbcL		psbD
rpl16	rpl16		psbD	rpl2	rpl16		psbD	rpl16	rpl16		psbE	rpl2	rpl16		psbE
rpl2	rpl2		psbE	rpl22	rpl2		psbE	rpl2	rpl2		psbF	rpl22	rpl2		psbF
rpl22	rpl22		psbF	rpoA	rpl22		psbF	rpl22	rpl22		psbF_psbL	rpoA	rpl22		psbF_psbL
rpoA	rpoA		psbF_psbL	rpoB	rpoA		psbF_psbL	rpoA	rpoA		psbH	rpoB	rpoA		psbH
rpoB	rpoB		psbH	rpoC1	rpoB		psbH	rpoB	rpoB		psbH_psbN	rpoC1	rpoB		psbH_psbN
rpoC1	rpoC1		psbH_psbN	rpoC2	rpoC1		psbH_psbN	rpoC1	rpoC1		psbI	rpoC2	rpoC1		psbI
rpoC2	rpoC2		psbI	rps11	rpoC2		psbI	rpoC2	rpoC2		psbJ	rps11	rpoC2		psbJ
rps11	rps11		psbJ	rps18	rps11		psbJ	rps11	rps11		psbJ_psbL	rps18	rps11		psbJ_psbL
rps18	rps18		psbJ_psbL	rps19	rps18		psbJ_psbL	rps18	rps18		psbK	rps19	rps18		psbK
rps19	rps19		psbK	rps3	rps19		psbK	rps19	rps19		psbL	rps3	rps19		psbL
rps3	rps3		psbL	rps4	rps3		psbL	rps3	rps3		psbM	rps4	rps3		psbM
rps4	rps4		psbM	rps8	rps4		psbM	rps4	rps4		psbN	rps8	rps4		psbN
rps8	rps8		psbN	ycf12	rps8		psbN	rps8	rps8		psbN_psbT	ycf12	rps8		psbN_psbT
ycf1	ycf1		psbN_psbT	ycf3	ycf12		psbN_psbT	ycf12	ycf12		psbT	ycf3	ycf12		psbT
ycf12	ycf12		psbT		ycf3		psbT	ycf3	ycf3		psbZ		ycf3		psbZ
ycf2	ycf2		psbZ				psbZ				rbcL				rbcL
ycf3	ycf3		rbcL				rbcL				rpl16				rpl16
			rpl16				rpl16				rpl16_rps3				rpl16_rps3
			rpl16_rps3				rpl16_rps3				rpl2				rpl2
			rpl2				rpl2				rpl22				rpl22
			rpl22				rpl22				rpl22_rps19				rpl22_rps19
			rpl22_rps19				rpl22_rps19				rpl22_rps3				rpl22_rps3
			rpl22_rps3				rpl22_rps3				rpoA				rpoA
			rpoA				rpoA				rpoA_rps11				rpoA_rps11
			rpoA_rps11				rpoA_rps11				rpoB				rpoB
			rpoB				rpoB				rpoC1				rpoC1
			rpoC1				rpoC1				rpoC1_rpoC2				rpoC1_rpoC2
			rpoC1_rpoC2				rpoC1_rpoC2				rpoC2				rpoC2
			rpoC2				rpoC2				rps11				rps11
			rps11				rps11				rps18				rps18
			rps18				rps18				rps19				rps19
			rps19				rps19				rps3				rps3
			rps3				rps3				rps4				rps4
			rps4				rps4				rps4_ycf3				rps4_ycf3
			rps4_ycf3				rps4_ycf3				rps8				rps8
			rps8				rps8				ycf1				ycf1
			ycf1				ycf1				ycf12				ycf12
			ycf12				ycf12				ycf2				ycf3
			ycf2				ycf3				ycf3
			ycf3
