# Supplementary material for: Phylogenomic data resolved the deep relationships of Gymnogynoideae (Selaginellaceae)
Source: Front Plant Sci. 2024 Jul 16;15:1405253. doi: 10.3389/fpls.2024.1405253 (PMC11287774; doi:10.3389/fpls.2024.1405253)
Supplement: Supplementary Table 4 — Character coding of the taxa used in this study. [file Table_4.xlsx]

## Sheet: TableS4
Taxon	Plastome Structure	Habit
Isoetes coromandelina	IR	Hydrophytes
Isoetes humilior	IR	Hydrophytes
Afroselaginella myosurus -1	NR	Mesophytes
Afroselaginella myosurus -2	NR	Mesophytes
Bryodesma ×neomexicanum	DR	Xerophytes
Bryodesma bigelovii	DR	Xerophytes
Bryodesma indica	DR	Xerophytes
Bryodesma landii	DR	Xerophytes
Bryodesma muticum	DR	Xerophytes
Bryodesma limitaneum -1	DR	Xerophytes
Bryodesma limitaneum -2	DR	Xerophytes
Bryodesma peruvianum	IR	Xerophytes
Bryodesma rupestre	DR	Xerophytes
Bryodesma rupincola	DR	Xerophytes
Bryodesma tortipilum	DR	Xerophytes
Bryodesma underwoodii	DR	Xerophytes
Bryodesma vardei	DR	Xerophytes
Bryodesma wallacei -1	DR	Xerophytes
Bryodesma wallacei -2	DR	Xerophytes
Didiclis mayeri	DR-IR	Mesophytes
Didiclis picta	DR-IR	Mesophytes
Ericetorum lyallii -1	DR	Mesophytes
Ericetorum lyallii -2	DR	Mesophytes
Ericetorum lyallii -3	DR	Mesophytes
Ericetorum pectinatum -1	DR	Mesophytes
Ericetorum pectinatum -2	DR	Mesophytes
Gymnogynum arthriticum	DR-IR	Mesophytes
Gymnogynum kraussianum	DR	Mesophytes
Gymnogynum lingulatum	DR-IR	Mesophytes
Gymnogynum remotifolium -1	DR	Mesophytes
Gymnogynum remotifolium -2	DR	Mesophytes
Gymnogynum silvestre	DR	Mesophytes
Kungiselaginella biformis	DR-IR	Mesophytes
Lepidoselaginella lepidophylla -1	IR	Xerophytes
Lepidoselaginella lepidophylla -2	IR	Xerophytes
Megaloselaginella exaltata -1	DR-IR	Mesophytes
Megaloselaginella exaltata -2	DR-IR	Mesophytes
Megaloselaginella (A. grallipes)	DR-IR	Mesophytes
Selaginella pallescens	DR-IR	Xerophytes
