# Supplementary material for: Phylogenomic data resolved the deep relationships of Gymnogynoideae (Selaginellaceae)
Source: Front Plant Sci. 2024 Jul 16;15:1405253. doi: 10.3389/fpls.2024.1405253 (PMC11287774; doi:10.3389/fpls.2024.1405253)
Supplement: Supplementary Table 5 — Features of plastomes used in this study. [file Table_5.xlsx]

## Sheet: TableS5
Taxon	Plastome size (bp)	Plastome GC content	LSC (bp)	SSC (bp)	RC (bp)	Gene no.	tRNA no.	rRNA no.
Afroselaginella myosurus -1	100119	0.511	-	-	-	72	10	4
Afroselaginella myosurus -2	100346	0.511	-	-	-	72	10	4
Bryodesma ×neomexicanum	122746	0.524	48339	45797	14305	91	17	8
Bryodesma bigelovii	123152	0.526	48699	45881	14286	91	17	8
Bryodesma indica	122460	0.536	48395	45711	14177	90	17	8
Bryodesma landii	122991	0.527	48369	45954	14334	91	17	8
Bryodesma muticum	121418	0.527	47285	45661	14236	91	17	8
Bryodesma limitaneum -1	122861	0.524	48339	45896	14313	91	17	8
Bryodesma limitaneum -2	122956	0.524	48348	45912	14420	91	17	8
Bryodesma peruvianum	112900	0.526	91273	20899	364	80	14	4
Bryodesma rupestre	129338	0.523	47129	45821	18194	91	17	8
Bryodesma rupincola	122820	0.524	48327	45821	14336	91	17	8
Bryodesma tortipilum	123359	0.536	48867	46028	14232	91	17	8
Bryodesma underwoodii	121518	0.526	47304	45734	14240	88	17	8
Bryodesma vardei	121254	0.532	47676	45792	13893	91	17	8
Bryodesma wallacei -1	122466	0.524	47834	46128	14252	90	16	8
Bryodesma wallacei -2	123362	0.525	48159	45821	14691	91	17	8
Didiclis mayeri	144963	0.547	73032	47501	12215	101	16	8
Didiclis picta	144683	0.559	71964	47865	12427	100	16	8
Ericetorum lyallii -1	110490	0.508	45355	44978	10077	86	16	8
Ericetorum lyallii -2	110349	0.508	45540	45187	9846	86	16	8
Ericetorum lyallii -3	110411	0.507	45276	44943	10096	86	16	8
Ericetorum pectinatum -1	109746	0.508	46005	45925	8908	86	16	8
Ericetorum pectinatum -2	110646	0.507	45652	45264	9865	86	16	8
Gymnogynum arthriticum	125608	0.567	81100	17028	13740	96	14	8
Gymnogynum kraussianum	129971	0.523	54728	46049	14597	96	14	8
Gymnogynum lingulatum	124354	0.564	80248	16732	13687	96	14	8
Gymnogynum remotifolium -1	131867	0.565	55844	46351	14836	96	15	8
Gymnogynum remotifolium -2	131938	0.565	55893	46373	14836	96	15	8
Gymnogynum silvestre	128855	0.549	51920	45521	15707	98	15	8
Kungiselaginella biformis	143266	0.51	61435	57753	12039	97	14	8
Lepidoselaginella lepidophylla -1	113726	0.521	79805	19293	7314	85	13	8
Lepidoselaginella lepidophylla -2	114693	0.519	80625	19452	7308	85	13	8
Megaloselaginella exaltata -1	117595	0.518	47456	44915	12612	80	12	8
Megaloselaginella exaltata -2	117523	0.518	47419	44856	12624	80	12	8
Megaloselaginella (A. grallipes)	113548	0.53	57169	26975	14702	84	10	8
Selaginella pallescens	138980	0.506	59789	56417	11387	97	14	8
Isoetes humilior	145618	0.38	91983	27199	13217	129	37	8
Isoetes coromandelina	143420	0.378	90689	27107	12810	129	37	8
