# Supplementary material for: Phylogenomic data resolved the deep relationships of Gymnogynoideae (Selaginellaceae)
Source: Front Plant Sci. 2024 Jul 16;15:1405253. doi: 10.3389/fpls.2024.1405253 (PMC11287774; doi:10.3389/fpls.2024.1405253)
Supplement: Supplementary Table 6 — Length of sequence recovered by HybPiper for each single-copy gene and sample in this study. [file Table_6.xlsx]

## Sheet: TableS6
SCGs		6820	6918	7183	6938	7329	6994	6917	7306	7223	6966	7111	6941	7040	7031	7328	7139	7021	7066	7341	7054	6786	6987	7350	7219	7084	7100	6960	7264	7186	7297	6989	7181	7259	6929	7010	7197	7200	6819	7002	6946	6920	7030	6770	6788	7337	7117	7335	7227
	Species
MeanLength		1367	1221.4	1690.2	2992.3	956.3	1979.4	1589.7	1130.1	1157.8	1633.9	2149.1	1098	4662.5	2065.1	1095.2	2152.7	1549.5	3302.7	1341.1	2170.4	1784.7	1470.3	4876.3	1451.1	1170.9	1951.6	1791.1	1897.6	918	831.8	1539	1899.4	1461.3	2455.6	953.4	1250.8	2408.6	2653.1	1189.3	2248.9	2997.1	1879.4	1520	1947.6	1598.1	1613.9	1861	2901.2
	Megaloselaginella [A. grallipes (Alston) Li Bing Zhang & X.M. Zhou]	1410	1029	2097	3126	882	2190	1626	1131	1152	1941	2211	1155	4275	2541	618	0	1536	3210	0	2205	1800	1461	5550	1353	294	2052	1986	2205	1326	936	1299	1134	1416	2526	1191	1506	2643	2874	1326	2592	3276	2205	2388	1671	105	1545	0	3594
	Afroselaginella myosurus (Sw.) Li Bing Zhang & X.M. Zhou -1	1431	1338	2106	2955	1032	2208	1671	1170	1149	1899	4308	0	4281	2538	993	0	1494	3288	0	2208	1803	1419	5613	1362	0	2028	2019	2217	1005	912	1260	0	1368	2535	1086	1500	2817	2889	1320	2616	3270	2244	2373	1800	0	2982	0	3867
	Afroselaginella myosurus (Sw.) Li Bing Zhang & X.M. Zhou -2	1431	1317	2106	2955	1032	2208	1671	1131	1149	1899	4320	0	4284	2538	993	0	1551	3288	0	2208	1803	1422	5613	1398	0	2037	2019	2217	1371	912	1227	0	1368	2535	1086	1491	2817	2889	1320	2541	3270	2310	2373	1869	0	1536	105	3867
	Bryodesma ×neomexicanum (Maxon) Skoda	1587	1341	1878	3378	1041	2268	1698	1140	1158	1932	2259	1242	4215	2577	1122	2112	1710	3354	0	2397	1845	1479	5586	1473	1125	2013	2028	2202	825	672	1503	2046	1494	2724	1242	1296	2766	2865	1332	2583	3555	2271	2373	2361	543	1632	2088	4062
	Bryodesma bigelovii (Underw.) Soják	1536	1341	1854	3411	1044	2244	1698	1149	1158	1935	2238	1254	4209	2571	1128	2283	1671	3354	0	2424	1851	1476	5616	1494	1125	2028	2043	2208	825	726	1485	1965	1494	2724	1242	1254	2778	2865	1347	2580	3534	2277	2388	2364	237	1629	2259	4056
	Bryodesma landii (Greenm. & N. Pfeiff.) Li Bing Zhang & X.M. Zhou	1515	1350	1875	3393	1041	2274	1698	1143	1158	1935	2232	1173	4221	2553	1116	2511	1659	3360	0	2205	1854	1476	5625	1500	1107	2031	2010	2214	825	729	1488	2067	1500	2745	1230	1419	2775	2868	1368	2574	3534	2268	2385	2484	0	1623	2259	3993
	Bryodesma muticum (D.C. Eaton ex Underw.) Soják	1545	1365	1875	3378	1041	2274	1686	1149	1158	1932	2196	1173	4320	2574	1128	2445	1659	3513	0	2385	1848	1554	5622	1491	1119	2004	2049	2229	828	729	1485	2079	1497	2748	1245	1419	2772	2871	1368	2604	3633	2274	2385	2442	234	1632	2121	4077
	Bryodesma limitaneum (Weath.) Li Bing Zhang & X.M. Zhou -1	1542	1341	1878	3378	1044	2268	1698	1140	1158	1935	2256	1242	4215	2610	1125	2274	1710	3354	0	2424	1845	1479	5589	1497	1119	2028	2049	2187	822	723	1506	2037	1494	2721	1242	1305	2778	2859	1332	2577	3555	2274	2364	2367	234	1632	2094	4056
	Bryodesma limitaneum (Weath.) Li Bing Zhang & X.M. Zhou -2	1542	1341	1878	3378	1056	2268	1698	1140	1158	1935	2256	1245	4215	2610	1125	2274	1539	3354	0	2421	1845	1479	5607	1491	1119	2028	2049	2187	822	672	1506	2037	1338	2499	1242	1305	2778	2859	1332	2577	3555	2274	2364	2367	234	1632	2070	4056
	Bryodesma peruvianum (Milde) Soják	1503	1338	1875	3387	1041	2277	1698	1149	1158	1929	2211	1167	4206	2568	1122	2448	1656	3504	0	2205	1848	1449	5622	1488	1083	2034	2067	2223	825	726	1632	2076	1500	2748	1206	1404	2757	2868	1386	2595	3576	2286	2391	2472	108	1632	2103	4065
	Bryodesma rupestre (L.) Soják	1557	1359	1833	3420	1047	2223	1686	1149	1158	1917	2214	1173	4329	2574	1122	2466	1710	3513	0	2205	1905	1464	5622	1488	1110	2037	2037	2229	846	726	1488	2088	1494	2742	1242	1395	2778	2859	1380	2592	3645	2295	2373	2460	234	1632	2124	4104
	Bryodesma rupincola (Underw.) Soják	1557	1341	1878	3399	1044	2268	1698	1140	1158	1935	2265	1185	4269	2571	1125	2280	1533	3360	0	2415	1845	1479	5388	1491	1125	2028	2043	2178	825	672	1503	1674	1359	2499	1242	1266	2778	2865	1365	2064	3516	2253	2388	2361	1602	3075	2103	4056
	Bryodesma tortipilum (A. Braun) Soják	1488	1692	1632	3441	1053	2274	1698	1152	1158	1929	2208	1182	4266	2541	1149	2472	1392	3510	0	2400	1860	1545	5613	1503	1128	2034	2046	2226	816	714	1500	2112	1500	2739	1242	1455	2784	2871	1362	2580	3540	2262	2385	2451	234	1638	2283	4011
	Bryodesma underwoodii (Hieron.) Soják	1530	1353	1875	3390	1041	2274	1698	1140	1158	1929	2199	1173	4320	2574	1125	2454	1650	3513	0	2409	1854	1464	5616	1500	1119	2034	2049	2172	822	726	1494	2091	1494	2715	1242	1443	2757	2871	1350	2583	3642	2262	2367	2421	216	1632	2103	4053
	Bryodesma wallacei (Hieron.) Soják -1	1548	1338	1878	3384	1044	2274	1698	1149	1158	1935	2277	1233	4269	2610	1122	2493	1362	3360	0	2421	1866	1476	5598	1497	1116	2028	2052	2187	825	672	1488	1665	1467	2715	1242	1299	2778	2865	1317	2577	3195	2277	2388	2346	234	1635	2046	4056
	Bryodesma wallacei (Hieron.) Soják -2	1545	1326	1878	3351	1041	2271	1698	1140	1158	1932	2232	1242	4215	2604	1122	2496	1716	3360	0	2427	1857	1470	5598	1497	1131	2019	2043	2214	825	723	1497	2082	1494	2724	1242	1272	2778	2865	1353	2580	3489	2265	2379	2355	234	1629	2049	4053
	Didiclis mayeri (Hieron.) Li Bing Zhang & X.M. Zhou	1491	1335	2094	3834	1053	2193	1674	1251	1281	1857	2355	1131	5028	2616	1062	2310	1461	3477	0	2142	1833	1470	5289	1572	1224	2031	2103	2208	1356	1014	1635	1773	1152	2802	1242	1419	2733	2961	1221	2547	3540	1941	2397	2163	1707	1617	2097	4044
	Didiclis picta (Griff.) Li Bing Zhang & X.M. Zhou	453	0	2064	1632	0	0	1713	315	1284	441	2328	1131	5085	2592	0	0	993	3450	0	1038	0	846	0	0	606	1989	0	258	1305	1014	1644	0	1389	1377	0	1461	2754	2037	0	2319	3549	822	2286	1734	0	0	0	0
	Ericetorum lyallii (Hook. & Grev.) Li Bing Zhang & X.M. Zhou -1	0	0	0	225	0	0	0	0	0	282	246	0	327	0	0	0	306	0	0	0	90	0	222	618	0	0	0	0	0	0	0	0	1362	720	0	0	0	0	0	0	0	450	252	0	0	0	0	540
	Ericetorum lyallii (Hook. & Grev.) Li Bing Zhang & X.M. Zhou -2	0	0	0	0	0	0	0	0	0	0	0	0	132	0	0	0	0	0	0	0	0	0	0	183	0	0	0	0	0	0	0	0	1266	1212	0	0	0	0	0	0	0	234	0	0	0	0	0	0
	Ericetorum pectinatum (Spring) Li Bing Zhang & X.M. Zhou -1	0	0	0	0	0	0	0	0	0	108	0	0	153	0	0	0	210	0	0	0	0	0	0	240	0	0	0	0	0	0	0	0	1386	1308	0	0	0	0	0	0	0	0	0	0	0	0	0	0
	Ericetorum pectinatum (Spring) Li Bing Zhang & X.M. Zhou -2	0	81	351	453	987	819	969	660	213	435	885	147	444	0	0	0	234	2679	0	246	1494	0	732	378	0	0	0	0	348	0	1239	0	1275	1188	0	0	225	609	0	0	0	0	0	1002	0	348	0	615
	Gymnogynum arthriticum (Alston) Li Bing Zhang & X.M. Zhou	1146	1299	1743	2577	933	2262	1407	1146	1152	1890	2355	1143	5400	2553	591	2406	1392	3300	0	2214	1728	1401	5331	1362	414	1881	2040	2190	0	558	1221	945	1359	2556	1065	1254	2799	2808	801	2445	3261	2208	2373	1962	105	1560	111	3945
	Gymnogynum lingulatum (Spring) Li Bing Zhang & X.M. Zhou	1374	1302	1731	2595	924	2262	1407	1107	1152	1890	2340	1023	4194	2574	585	1761	1536	3396	0	2208	1719	1404	5268	1374	0	1881	2016	2187	0	900	1200	1068	1374	2553	1086	1254	2427	2808	1008	2496	3240	2283	2373	1689	0	1548	0	3936
	Gymnogynum remotifolium (Spring) Li Bing Zhang & X.M. Zhou -2	1401	1287	2055	3774	1005	2202	1497	1137	1152	1875	2370	1161	4164	2520	609	2415	1221	3366	0	2211	1752	1386	5295	1317	972	1998	2016	2172	1158	930	1332	1653	1356	2469	1137	1281	2640	2799	1044	2562	3477	2214	2370	2148	0	1563	0	3846
	Gymnogynum silvestre (Aspl.) Li Bing Zhang & X.M. Zhou	1404	1326	2073	3582	987	2040	1521	1158	1128	1899	2367	1185	4197	2523	597	2490	1443	3369	0	2202	1749	1410	5532	1404	1086	1965	2028	2184	1110	927	1323	1701	1317	2520	1143	909	2790	2880	960	2496	3495	2037	2376	2169	0	1554	2211	3753
	Kungiselaginella biformis (A. Braun ex Kuhn) Li Bing Zhang & X.M. Zhou	1752	1395	2070	3831	1032	2199	1674	1155	1140	1872	2337	1242	5916	2607	1254	2532	1698	3465	0	2208	1839	1530	5337	1380	1305	2037	2091	2208	1341	990	1389	1674	1395	2493	813	1527	3384	2883	1320	2670	3513	1512	2220	2259	1659	1626	1407	4029
	Lepidoselaginella lepidophylla (Hook. & Grev.) Li Bing Zhang & X.M. Zhou -1	1512	1353	2088	3582	1026	2271	1686	1137	1155	1941	2301	1191	4257	1815	1125	2475	1449	3333	0	1980	1836	1539	5517	1530	1218	2031	2085	1872	747	807	1338	2052	1491	2127	828	1485	2802	2883	1413	2568	3531	2283	2400	2007	99	1650	2406	3957
	Megaloselaginella exaltata (Kunze) Li Bing Zhang & X.M. Zhou -1	1416	1347	2088	2547	990	2178	1632	1155	1149	1716	2139	1248	4281	2559	636	795	1320	3276	0	2205	1806	1461	5634	1296	282	2049	2028	2211	1341	936	1263	1287	1344	2478	1065	1530	2586	2871	0	2541	3267	1914	2535	1539	204	1545	120	3624
	Selaginella pallescens (C. Presl) Spring	1725	1386	2193	3681	1044	2184	1626	834	1164	1872	2805	1215	5901	2571	1224	2538	1683	3489	0	2208	1767	1506	5592	1485	1236	2028	2088	2193	1356	957	1389	1860	1458	2808	1125	1548	3309	2868	933	2910	3438	2205	2544	2268	1614	1560	1782	3873
[truncated: 92 more columns]
